# Supplementary material
Source: PubMed Central journal article supplement (PMC4894654)
Supplement: NIHMS790207-supplement-Supplement.pdf [file NIHMS790207-supplement-Supplement.pdf]

## Supporting Information for

### Addressing the requirements of high sensitivity single-molecule imaging of low-copy number proteins in bacteria

Hannah H. Tuson,<sup>[a]</sup> Alisa Aliaj,<sup>[a]</sup> Eileen R. Brandes,<sup>[b]</sup> Lyle A. Simmons,<sup>[b]</sup> and Julie S. Biteen<sup>[a]\*</sup>

<sup>[a]</sup>Department of Chemistry; <sup>[b]</sup>Department of Molecular, Cellular, and Developmental Biology  
University of Michigan, Ann Arbor, MI 48019

#### **SI Movie Captions**

**Movie S1.** *B. subtilis* PY79 imaged under 561-nm laser excitation as described in Figure 1.

**Movie S2.** 3D localizations of fluorescent impurities in *B. subtilis* PY79 as described in Figure 2.

**Movies S3-S8.** Other Bacillus sp, *E. faecalis*, and *E. coli* MG1655 imaged under 561-nm laser excitation as described in Figure 3. **S3:** *B. megaterium*; **S4:** *B. thuringiensis*; **S5:** *B. cereus*; **S6:** *B. licheniformis*; **S7:** *E. faecalis*; **S8:** *E. coli* MG1655.

**Table S1.** Bacterial strains used in this study.

| Strain Name                        | Genotype                                                    | Source             |
|------------------------------------|-------------------------------------------------------------|--------------------|
| <i>B. subtilis</i> PY79            | Wild type                                                   | BGSC <sup>†</sup>  |
| <i>B. subtilis</i> HT01            | <i>pamcherry-recO</i>                                       | This work          |
| <i>B. subtilis</i> ERB81           | <i>amyE::P<sub>xyI</sub>-recO-mCitrine(mls<sup>R</sup>)</i> | This work          |
| <i>B. subtilis</i> PG603           | <i>recO-yfp</i>                                             | Kidane et al. 2004 |
| <i>B. megaterium</i> QM B1551      | Wild type                                                   | BGSC <sup>†</sup>  |
| <i>B. thuringiensis</i> HD735      | Wild type                                                   | BGSC <sup>†</sup>  |
| <i>B. cereus</i> ATCC 10987        | Wild type                                                   | BGSC <sup>†</sup>  |
| <i>B. licheniformis</i> ATCC 14580 | Wild type                                                   | BGSC <sup>†</sup>  |
| <i>E. faecalis</i> V583            | Wild type                                                   | Kevin Wood         |
| <i>E. coli</i> MG1655              | Wild type                                                   | CGSC <sup>‡</sup>  |

<sup>†</sup>BGSC: Bacillus Genetic Stock Center

<sup>‡</sup>CGSC: Coli Genetic Stock Center
